# Supplementary material for: Transcription-Based Amplified Colorimetric Thrombin Sensor Using Non-Crosslinking Aggregation of DNA-Modified Gold Nanoparticles
Source: Sensors (Basel). 2021 Jun 24;21(13):4318. doi: 10.3390/s21134318 (PMC8272040; doi:10.3390/s21134318)
Supplement: Supplementary file 1 [file sensors-21-04318-s001.zip › sensors-1255027-supplementary.pdf]

## SUPPLEMENTARY MATERIAL

# **Transcription-Based Amplified Colorimetric Thrombin Sensor Using Non-Crosslinking Aggregation of DNA-Modified Gold Nanoparticles**

Yu Muto <sup>1,2</sup>, Gen Hirao <sup>1</sup> and Tamotsu Zako <sup>1,\*</sup>

<sup>1</sup> Department of Chemistry and Biology, Graduate School of Science and Engineering, Ehime University, 2-5 Bunkyo, Matsuyama, Ehime, 790-8577, Japan; yuu-mutou-qr@tosoh.co.jp (Y.M.); f310165u@mails.cc.ehime-u.ac.jp (G.H.)

<sup>2</sup> Tokyo Research Center, TOSOH Corporation, 2743-1 Hayakawa, Ayase, Kanagawa 252-1123, Japan

\* Correspondence: zako.tamotsu.us@ehime-u.ac.jp

#### Probe-A

5' –

CGCCTAGGTTGGGTAGGGTGGTGGCGtttttttttttAATTCTAATACGACTCACTATAGGGAGAGGCAATAGCTCTGGCAA  
TTTCTTAaggctag

#### Probe-B

5' –

AGTCCGTGGTAGGGCAGGTGGGGTGACTtttttttttttCTTTTGCCGGTTGTTGACGATTCGTAGTTGATGATCGGGTAc  
tagcc

#### ssDNA-15

HS-(CH<sub>2</sub>)<sub>6</sub>-5' -TACCCGATCATCAAC

#### ssDNA-20

HS-(CH<sub>2</sub>)<sub>6</sub>-5' -TACCCGATCATCAACTACGA

#### agDNA-15

5' -GTTGATGATCGGGTA

#### agDNA-20

5' -TCGTAGTTGATGATCGGGTA

#### RNA-15

5' -UACCCGAUCAUCAAC

#### NA

5' -tttttttttttAATTCTAATACGACTCACTATAGGGAGAGGCAATAGCTCTGGCAATTTCTTAaggctag

#### NB

5' -tttttttttttCTTTTGCCGGTTGTTGACGATTCGTAGTTGATGATCGGGTActagcc

#### MB

FAM-5' -GCCAGCTCGTAGTTGATGATCGGGTAGCTGGC-BHQ1

**Figure S1** Nucleotide sequences of the DNA probes (Probe-A and Probe-B), the AuNP surface-bound thiolated DNA (ssDNA-15, ssDNA-20), complementary DNA (agDNA-15, agDNA-20), RNA (RNA-15), negative control probe (NA, NB), and MB. The underlined parts of Probe-A and Probe-B function as anti- $\alpha$ -thrombin DNA aptamers. For Probe-A and Probe-B, NA and NB, the small blue letters at the 3'-end indicate the complementary sequence for hybridization. For Probe-A and NA, T7-RNA promoter sequences were shown in red. For MB, FAM and BHQ1 indicate a fluorescent dye (6-carboxyfluorescein) and a quencher (Black Hole Quencher 1), respectively.

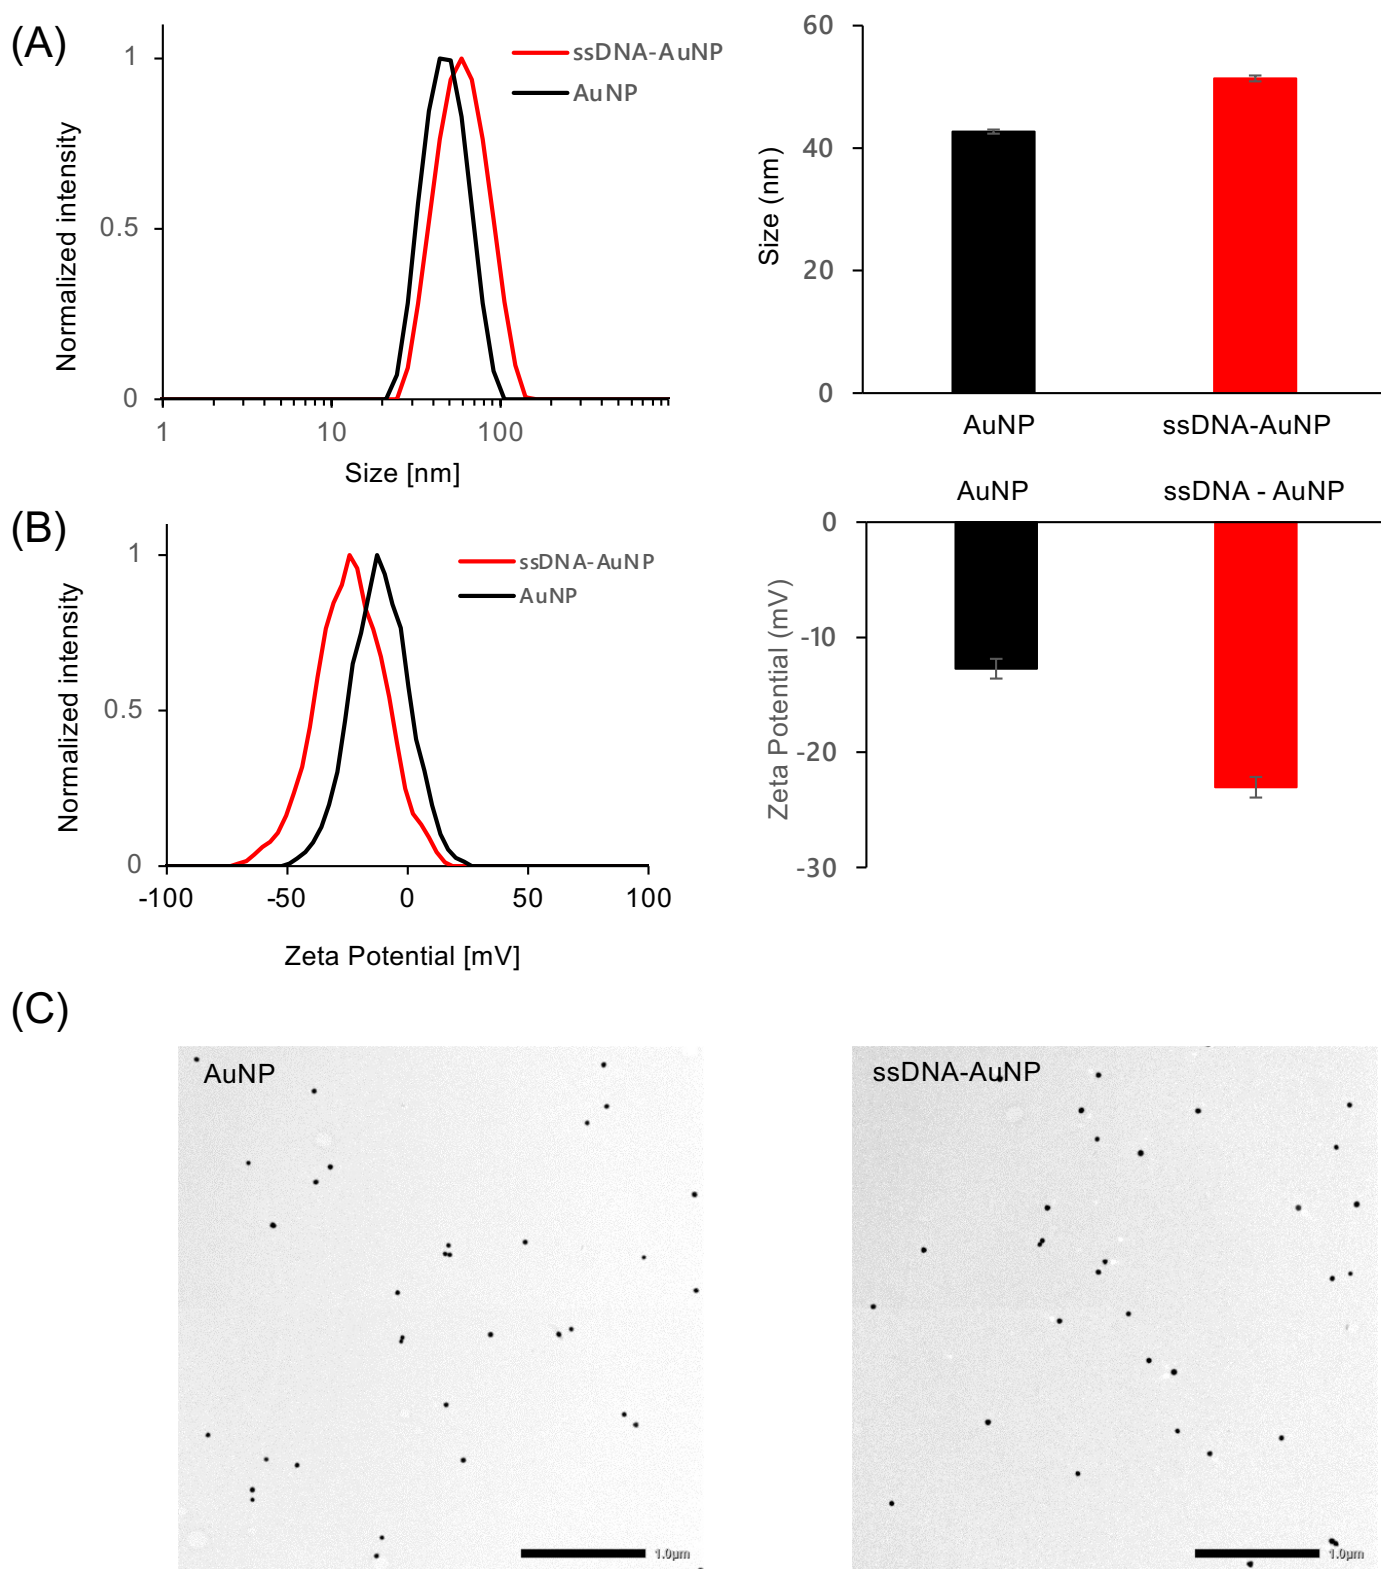

**Figure S2** Characterization of ssDNA-modified AuNPs

(A) The size of 10 pM unmodified 40 nm AuNPs (AuNP) and ssDNA-modified 40 nm AuNPs (ssDNA-AuNP) was evaluated with dynamic light scattering analysis using Zetasizer-Nano ZS (Malvern Worcestershire, UK) (left). The average values of three measurement were shown in the right panel.

(B) The zeta potential values of 5 pM AuNPs and ssDNA-AuNP were measured with Zetasizer-Nano ZS (left). The average values of three measurement were shown in the right panel.

(C) TEM images of 40 nm AuNPs (left) and ssDNA-AuNPs (right). Transmission electron microscopy (TEM) was performed in order to confirm the dispersion of ssDNA-AuNPs. 10  $\mu$ L sample was spotted on collodion-film coated TEM copper grids and allowed to adsorb. Samples were examined with an excitation voltage of 80 kV using a JEM-1400Plus TEM (JEOL, Tokyo, Japan).

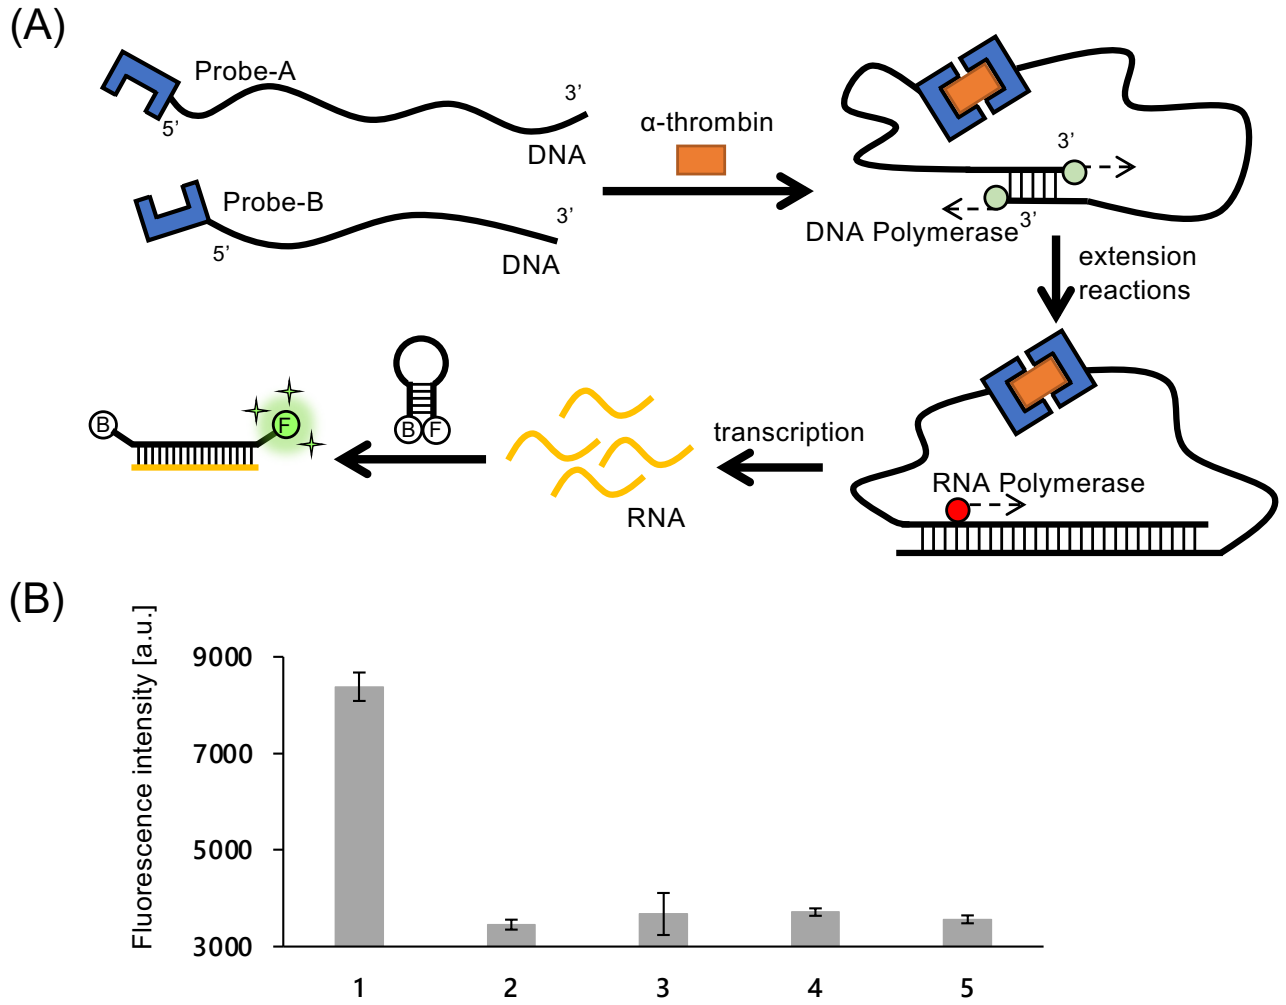

**Figure S3** (A) Schematic illustration of the fluorescence intensity change induced by hybridization of MB to RNA duplex. (B) Fluorescence intensity changes of MB under different conditions: (1) 100 nM  $\alpha$ -thrombin, (2) 0 nM  $\alpha$ -thrombin, (3) without DNA polymerase, (4) without RNA polymerase, and (5) without aptamer units (NA and NB were used instead of Probe-A and Probe-B). Reaction temperature was 42 °C.
